# Supplementary material
Source: publisher site journal article supplement (https://www.dovepress.com/article/supplementary_file/570608/570608%20Supplementary%20Material.xlsx)
Supplement: Supplementary file 1 [file 570608%20Supplementary%20Material.xlsx]

## Sheet: Sheet3
GROUP，1=laser,2=RF	year	PREGNANT	DELIVERY	1Hpad Pre	1Hpad 6	1Hpad 12	ICIQ-Pre	ICIQ6	ICIQ12	PGI6	PGI12
1	48	2	2	9.1	3.6	6.1	8	5	5	2	2
1	49	5	3	2.6	0	0	16	3	5	2	2
1	56	2	2	2.7	0	0.3	13	6	10	2	3
1	51	5	2	56	11	23	12	5	5	2	2
1	33	2	1	7.5	2.5	7	14	6	12	3	4
1	52	2	2	74	35	29	8	4	6	2	3
1	33	2	2	8.2	2	0	6	7	7	2	2
1	54	1	1	19.5	3.9	17.9	21	15	21	3	4
1	42	7	2	13.5	4.2	4.5	8	5	5	2	2
1	47	2	2	3.5	0	0	6	3	6	2	2
1	33	4	2	3.6	0.3	5.9	5	5	5	4	4
1	48	1	1	20.8	10.3	9.8	13	5	8	2	2
1	33	1	1	3.5	0	0	4	4	1	1	1
1	42	2	2	4.2	2.1	0.9	8	2	4	2	3
1	31	1	1	46	36.8	52	15	6	15	3	4
1	54	2	2	12.9	3.5	28.2	16	8	16	2	4
1	43	3	3	2.9	0	0	7	3	4	2	3
1	39	3	2	72	25	39	10	6	10	3	3
1	36	3	3	2.5	0.3	0.8	9	5	8	2	3
1	35	2	3	123	78	106	11	7	11	3	4
1	37	4	2	2.3	0	2.6	9	6	6	2	4
1	34	2	2	11.4	7.2	18.9	12	8	12	3	4
1	41	3	1	4.9	2.5	15.3	9	8	10	3	5
1	45	4	2	2.4	0	4.7	5	2	2	3	4
1	45	4	3	3.1	0	0.4	5	2	2	2	3
1	38	4	2	4.5	2.2	0.1	7	7	10	3	3
1	40	1	1	2.6	0	3.1	5	2	2	2	4
1	49	5	1	9.6	2.8	10.4	9	9	10	4	5
1	35	1	1	23.5	10.7	46.2	18	18	18	4	6
1	48	5	2	3.9	0	0.6	9	6	6	2	3
1	37	3	2	2.3	0	2.3	5	3	3	3	4
1	37	2	2	6.1	4.1	1.5	6	3	3	3	4
1	47	5	3	4.4	2	3	8	4	4	3	4
1	48	3	2	4.9	0	2.1	10	4	6	3	3
1	34	4	3	3.2	1.2	3.9	12	4	6	3	4
1	52	3	2	5.2	0.2	2.7	15	6	6	2	3
1	35	2	2	3.2	0	1.3	4	4	4	2	3
1	44	2	2	7.9	6.1	3.3	12	6	8	3	3
1	37	3	1	5	2.1	2.5	16	6	6	2	3
1	42	2	2	11.4	5.3	2.7	7	2	4	2	3
1	32	3	3	3.1	0	0	13	4	4	2	2
1	36	4	3	9.6	2.1	4.3	8	4	6	2	3
1	21	1	1	76	29	102	13	4	6	2	2
1	33	2	4	2.7	0	0	7	2	4	3	3
1	44	2	2	3.1	0	0	8	4	6	2	3
1	41	4	2	2.6	0	0.2	7	4	4	2	3
1	43	3	2	26	12	36	12	12	14	4	4
1	37	6	3	83.3	47	151	11	11	11	4	5
1	40	4	3	104.7	94.6	79.3	15	15	17	4	4
1	55	2	2	23	21	34.5	9	10	10	4	5
1	45	2	2	3.6	2.9	1.4	8	8	8	4	4
1	36	1	1	2.6	3.9	10.6	8	8	8	4	5
2	46	4	2	11.4	0	3.9	11	2	3	2	1
2	56	3	2	2.7	3.2	3.2	11	0	0	1	1
2	39	4	2	6.3	3.9	3.9	13	4	4	3	3
2	33	4	1	2.8	0.5	0.5	5	4	4	4	4
2	54	1	1	5	5	5	14	14	14	3	3
2	45	2	1	10.5	10.2	10.2	18	12	12	3	3
2	40	5	3	13.1	3	13	11	6	6	4	4
2	37	2	2	2.6	0.8	0	6	0	1	1	3
2	60	4	1	44.9	5.3	1	10	7	5	3	3
2	58	3	2	8.8	1.8	2.5	10	10	10	3	3
2	31	2	2	3.7	2.8	4.4	9	8	8	3	3
2	32	4	2	3	1.3	2.3	5	4	4	3	3
2	41	5	2	20.5	6	7	15	10	10	3	3
2	33	3	2	2.9	2.1	2.5	9	3	3	4	4
2	29	1	1	2.2	0	0	5	0	4	1	2
2	28	2	2	2.6	2.3	2.1	8	6	6	4	4
2	39	6	2	2.7	1.5	0.7	7	8	8	2	2
2	39	2	1	6.1	37.5	3	10	9	7	4	4
2	40	1	1	6.1	0.5	0.4	5	8	11	3	3
2	44	4	2	5.1	2.6	2.9	6	4	4	3	3
2	38	2	2	2.9	0.5	2	11	5	9	4	4
2	45	6	2	6.2	4.2	3.9	16	15	15	3	3
2	39	3	2	16	5	5	17	17	17	4	4
2	33	2	2	7	0.6	1	6	4	4	2	4
2	38	5	2	9	3.8	4.5	5	5	5	3	3
2	50	2	1	8	1	2.1	8	6	4	2	2
2	39	2	2	2.2	4.4	4.4	10	5	5	3	3
2	39	5	2	3.1	0	0	3	0	0	2	2
2	33	1	1	11.1	5.8	7.6	10	9	9	4	4
2	35	3	2	15.7	2.1	2.1	8	6	6	2	2
2	36	3	2	5.5	2	2	16	9	9	1	1
2	38	3	2	18	2.8	2.8	6	6	6	2	2
2	37	2	2	2.8	1.1	0.8	14	9	9	3	3
2	36	3	3	19	9	10.2	13	5	5	4	4
2	29	3	1	6.2	1.5	1	13	7	7	2	2
2	42	1	1	6.1	0.8	0.2	9	7	7	1	1
2	34	2	1	17.8	6	5.6	8	6	6	3	3
2	42	3	1	3.4	5.2	3.8	6	5	5	4	4
2	41	3	1	3.2	0.8	0	7	6	6	2	2
2	40	4	2	8.8	1.9	1.9	9	8	8	3	3
2	37	1	2	8.5	0.3	0.5	6	4	4	3	3
2	40	3	2	7.6	2.8	3.1	11	10	10	3	3
2	45	4	1	6.2	0.9	1	10	7	7	3	3
2	36	3	2	37	2	2	11	4	4	2	2
2	40	2	2	10.4	2.1	2	9	4	4	3	3
2	35	2	2	4.1	4	4	9	6	6	4	4
2	45	2	1	2.7	0.24	0.24	8	9	9	3	3
2	38	3	2	2.8	1.8	1.8	6	6	6	4	4
2	35	2	2	3.6	0.1	0.3	4	4	4	2	2
2	40	2	1	14.9	0.5	0.3	6	5	5	2	2
2	38	2	2	16.1	12	18	13	15	15	4	4
2	35	6	3	8.9	1.2	1.8	11	9	9	2	2
2	39	5	3	6.5	2	2	11	8	8	3	3
2	34	1	1	20	1	2.1	5	6	6	2	2
